# Supplementary material for: Phylogenomic analysis of the Lake Kronotskoe species flock of Dolly Varden charr reveals genetic and developmental signatures of sympatric radiation
Source: PubMed Central journal article supplement — bioRxiv. 2024 Apr 27:2023.02.24.529919. Preprint. [Version 3] doi: 10.1101/2023.02.24.529919 (PMC11071292; doi:10.1101/2023.02.24.529919), 2024-04-27
Supplement: NIHPP2023.02.24.529919v3-supplement-6.pdf [file NIHPP2023.02.24.529919v3-supplement-6.pdf]

**Figure 2 – Supplementary Figure 1**

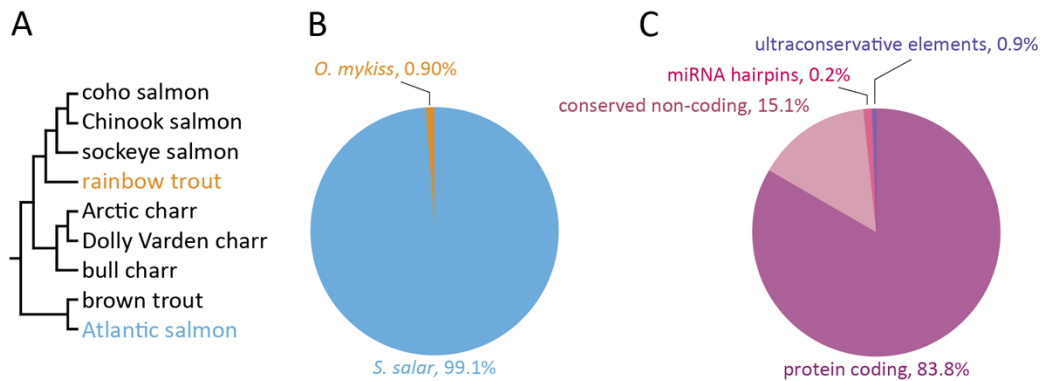

**Figure 2 – Supplementary Figure 1. Design of pan-Salmoniformes targeted capture array. (A)** Conserved bait sequences were derived from Atlantic salmon (*Salmo salar*) and rainbow trout (*Oncorhynchus mykiss*) reference genomes. **(B)** Relative contributions of *S. salar* and *O. mykiss* derived bait sequences to the capture array. **(C)** Classifications and relative abundances of conserved elements targeted for capture.

Figure 2 – Supplementary Figure 2

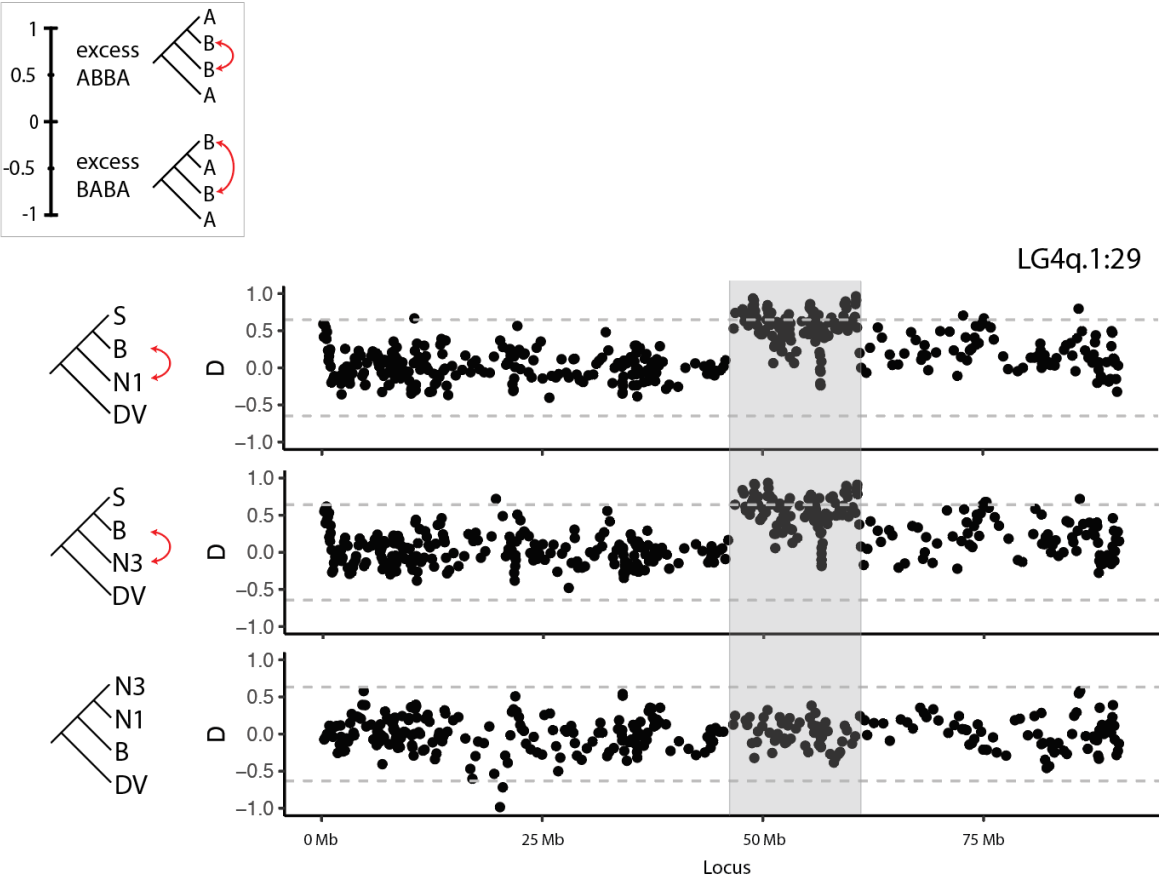

**Figure 2 – Supplementary Figure 2. Sliding window plots of D showing a large interval of excess allele sharing.** Sliding window plots for trios consisting of Smallmouth (S), Bigmouth (B), and Nosed 1 (N1), of S, B, and Nosed 3 (N3), and of N3, N1, and B. Positive D values indicate an excess of the ABBA pattern (red arrows), while negative values indicate an excess of the BABA pattern. The three plots show a common pattern of excess of allele sharing overlapping with between B and N1 and B and N3, while there is no excess of allele sharing between B and N1 over B and N3. Horizontal lines signify 3SDs from the mean.

**Figure 2 – Supplementary Table 1**

| Morphotype            | No. Individuals<br>Pooled | No. Reads<br>(million) | No. Reads<br>Mapped | Median<br>Depth | Mean<br>Depth | "Conservome"<br>Coverage |       |
|-----------------------|---------------------------|------------------------|---------------------|-----------------|---------------|--------------------------|-------|
|                       |                           |                        |                     |                 |               | 2x                       | 10x   |
| Bigmouth              | 8                         | 72.3                   | 35.3                | 66 reads        | 88 reads      | 91.6%                    | 88.5% |
| Dolly Varden          | 3                         | 64.1                   | 32.4                | 61 reads        | 82 reads      | 91.6%                    | 88.3% |
| Longhead              | 10                        | 46.1                   | 22.8                | 41 reads        | 56 reads      | 91.1%                    | 85.7% |
| Nosed 1               | 5                         | 68.8                   | 34.9                | 65 reads        | 87 reads      | 91.7%                    | 88.5% |
| Nosed 2               | 7                         | 49.5                   | 17.5                | 16 reads        | 20 reads      | 88.7%                    | 65.5% |
| Nosed 3               | 5                         | 68.4                   | 34.1                | 63 reads        | 84 reads      | 91.6%                    | 88.5% |
| Smallmouth            | 6                         | 43.1                   | 21.1                | 38 reads        | 52 reads      | 90.8%                    | 84.9% |
| <i>S. leucomaenis</i> | 1                         | 55.9                   | 25.5                | 50 reads        | 67 reads      | 90.5%                    | 85.9% |
| White                 | 6                         | 36.9                   | 18.5                | 34 reads        | 46 reads      | 90.6%                    | 83.8% |

**Figure 2 – Supplementary Table 1.** Summary of reads aligned and targeted element coverage.

713 **Figure 2 – Supplementary Table 2**

| GO name                                                         | GO accession | bin size |
|-----------------------------------------------------------------|--------------|----------|
| activation of MAPK activity                                     | GO:0000187   | 15       |
| anaphase-promoting complex                                      | GO:0005680   | 51       |
| anaphase-promoting complex-dependent catabolic process          | GO:0031145   | 41       |
| ATP-dependent chromatin remodeling                              | GO:0043044   | 133      |
| ATPase activity                                                 | GO:0016887   | 262      |
| calcium ion binding                                             | GO:0005509   | 1185     |
| calcium, potassium:sodium antiporter activity                   | GO:0008273   | 52       |
| carbohydrate binding                                            | GO:0030246   | 111      |
| carbohydrate metabolic process                                  | GO:0005975   | 204      |
| cell adhesion                                                   | GO:0007155   | 541      |
| chemokine activity                                              | GO:0008009   | 72       |
| cullin-RING ubiquitin ligase complex                            | GO:0031461   | 23       |
| DNA binding                                                     | GO:0003677   | 2972     |
| DNA integration                                                 | GO:0015074   | 1571     |
| DNA-templated transcription, initiation                         | GO:0006352   | 36       |
| ferric iron binding                                             | GO:0008199   | 24       |
| fructose-bisphosphate aldolase activity                         | GO:0004332   | 27       |
| hexose metabolic process                                        | GO:0019318   | 34       |
| homophilic cell adhesion via plasma membrane adhesion molecules | GO:0007156   | 362      |
| iron ion transport                                              | GO:0006826   | 23       |
| isomerase activity                                              | GO:0016853   | 45       |
| MAP kinase activity                                             | GO:0004707   | 52       |
| nucleic acid binding                                            | GO:0003676   | 2731     |
| oligopeptide transport                                          | GO:0006857   | 20       |
| phosphatidylinositol metabolic process                          | GO:0046488   | 49       |
| phosphatidylinositol phosphate kinase activity                  | GO:0016307   | 47       |
| receptor tyrosine kinase binding                                | GO:0030971   | 28       |
| regulation of mitotic metaphase/anaphase transition             | GO:0030071   | 44       |
| sensory perception of sound                                     | GO:0007605   | 69       |
| skeletal muscle fiber development                               | GO:0048741   | 44       |
| SWI/SNF complex                                                 | GO:0016514   | 147      |
| transcription coactivator activity                              | GO:0003713   | 164      |
| transcription factor TFIID complex                              | GO:0005669   | 38       |
| transmembrane transport                                         | GO:0055085   | 1148     |
| transmembrane transporter activity                              | GO:0022857   | 306      |
| transporter activity                                            | GO:0005215   | 218      |
| transposition, DNA-mediated                                     | GO:0006313   | 1551     |
| ubiquitin protein ligase binding                                | GO:0031625   | 28       |
| vesicle-mediated transport                                      | GO:0016192   | 250      |

714  
715 **Figure 2 – Supplementary Table 2. Table of significantly underrepresented GO terms.** This  
716 table contains the set of significantly underrepresented GO terms among all sample libraries  
717 (Benjamini-Hochberg FDR < 0.05).

719 **Figure 2 – Supplementary Table 3**

| Pop 1 | Pop 2 | Pop 3 | D <sub>tree</sub> (%) | f <sub>4</sub> -ratio (%) | p-value  | Z-score |
|-------|-------|-------|-----------------------|---------------------------|----------|---------|
| S     | N3    | W     | 3.9                   | 8.6                       | 0        | 13.0*   |
| S     | N1    | W     | 3.7                   | 8.2                       | 0        | 11.4*   |
| S     | N3    | L     | 2.8                   | 6.3                       | 0        | 11.4*   |
| S     | N1    | L     | 2.2                   | 4.9                       | 1.18E-16 | 8.3*    |
| S     | B     | N1    | 4.2                   | 9.0                       | 1.56E-15 | 8.0*    |
| S     | B     | W     | 2.2                   | 4.7                       | 1.26E-14 | 7.7*    |
| B     | N3    | W     | 1.8                   | 4.1                       | 2.44E-14 | 7.6*    |
| L     | W     | N1    | 2.2                   | 4.5                       | 2.73E-13 | 7.3*    |
| L     | W     | B     | 1.7                   | 3.9                       | 2.76E-13 | 7.3*    |
| B     | N1    | W     | 1.7                   | 3.7                       | 2.11E-12 | 7.0*    |
| S     | B     | N3    | 3.6                   | 8.3                       | 2.31E-11 | 6.7*    |
| L     | W     | N3    | 1.8                   | 3.8                       | 4.65E-09 | 5.9*    |
| B     | N3    | L     | 1.8                   | 4.0                       | 6.52E-07 | 5.0*    |
| S     | B     | L     | 1.1                   | 2.4                       | 1.01E-04 | 3.9*    |
| B     | N1    | L     | 1.2                   | 2.6                       | 3.59E-04 | 3.6*    |
| N1    | N3    | L     | 0.7                   | 1.5                       | 1.13E-03 | 3.3*    |
| L     | W     | S     | 0.5                   | 1.4                       | 2.86E-03 | 3.0     |
| N1    | N3    | S     | 0.4                   | 0.9                       | 5.72E-02 | 1.9     |
| N1    | N3    | W     | 0.2                   | 0.5                       | 2.79E-01 | 1.1     |
| N3    | N1    | B     | 0.3                   | 0.7                       | 2.86E-01 | 1.1     |

720  
721  
722 **Figure 2 – Supplementary Table 3.** Table of D<sub>tree</sub> scores, f<sub>4</sub>-admixture ratios, and Z-scores for  
723 each of the 20 trios contained within the Lake Kronotskoe species flock. 16 trios were found to  
724 have a significant, though minimal, contribution of introgressed alleles (asterisks)(Holm-  
725 Bonferoni, FWER < 0.01). B, Bigmouth; L, Longhead; N1, Nosed 1; N3, Nosed 3; S, Smallmouth;  
726 W, White.

801 **Figure 7 – Supplementary Figure 1**

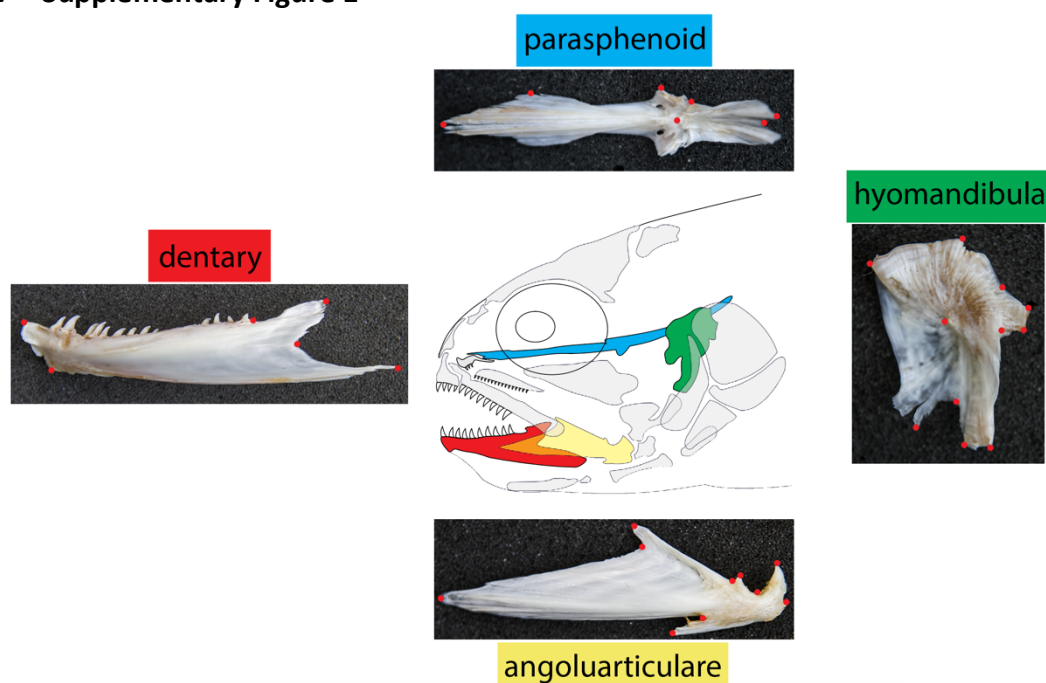

802  
803  
804 **Figure 7 – Supplementary Figure 1. Landmarks used to geomorphic morphometric analyses.**  
805 Landmarks were assigned to each of four bones. The dentary (red), the parasphenoid (blue),  
806 the hyomandibula (green), and the anguloarticular (yellow).  
807  
808

Figure 7 – Supplementary Figure 2

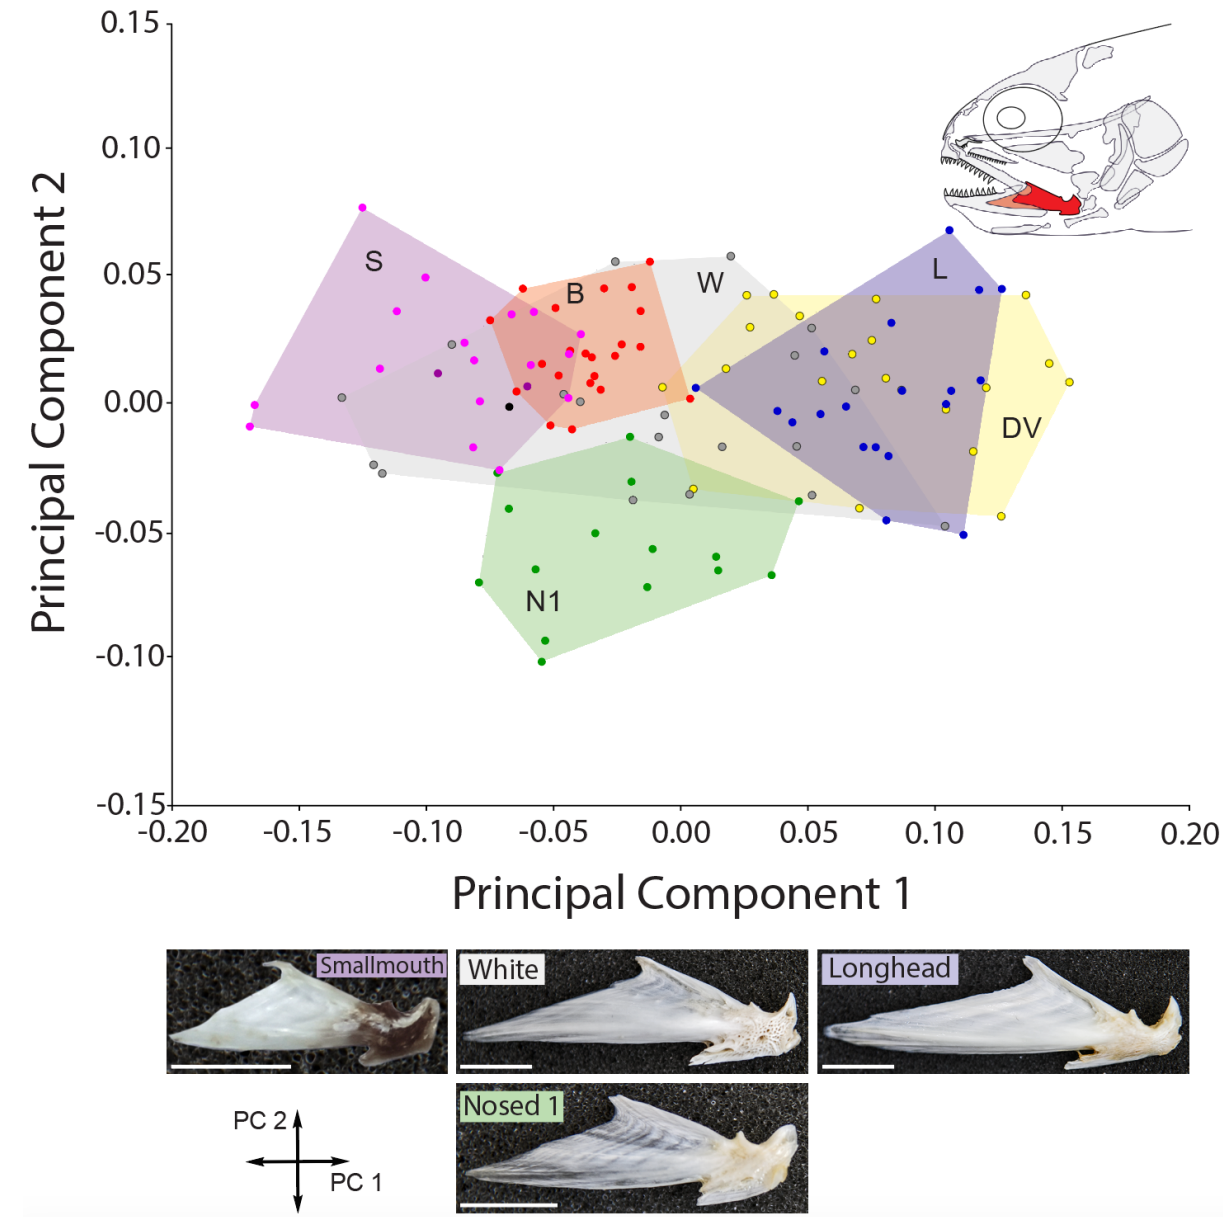

**Figure 7 – Supplementary Figure 2. Geometric morphometric analyses of anguloarticulare among Lake Kronotskoe morphs.** Procrustes analyses identified highly significant differences in shape (Procrustes ANOVA  $F_{80,1760}=18.88$   $p<0.0001$ ). Scale bar = 10mm.

Figure 7 – Supplementary Figure 3

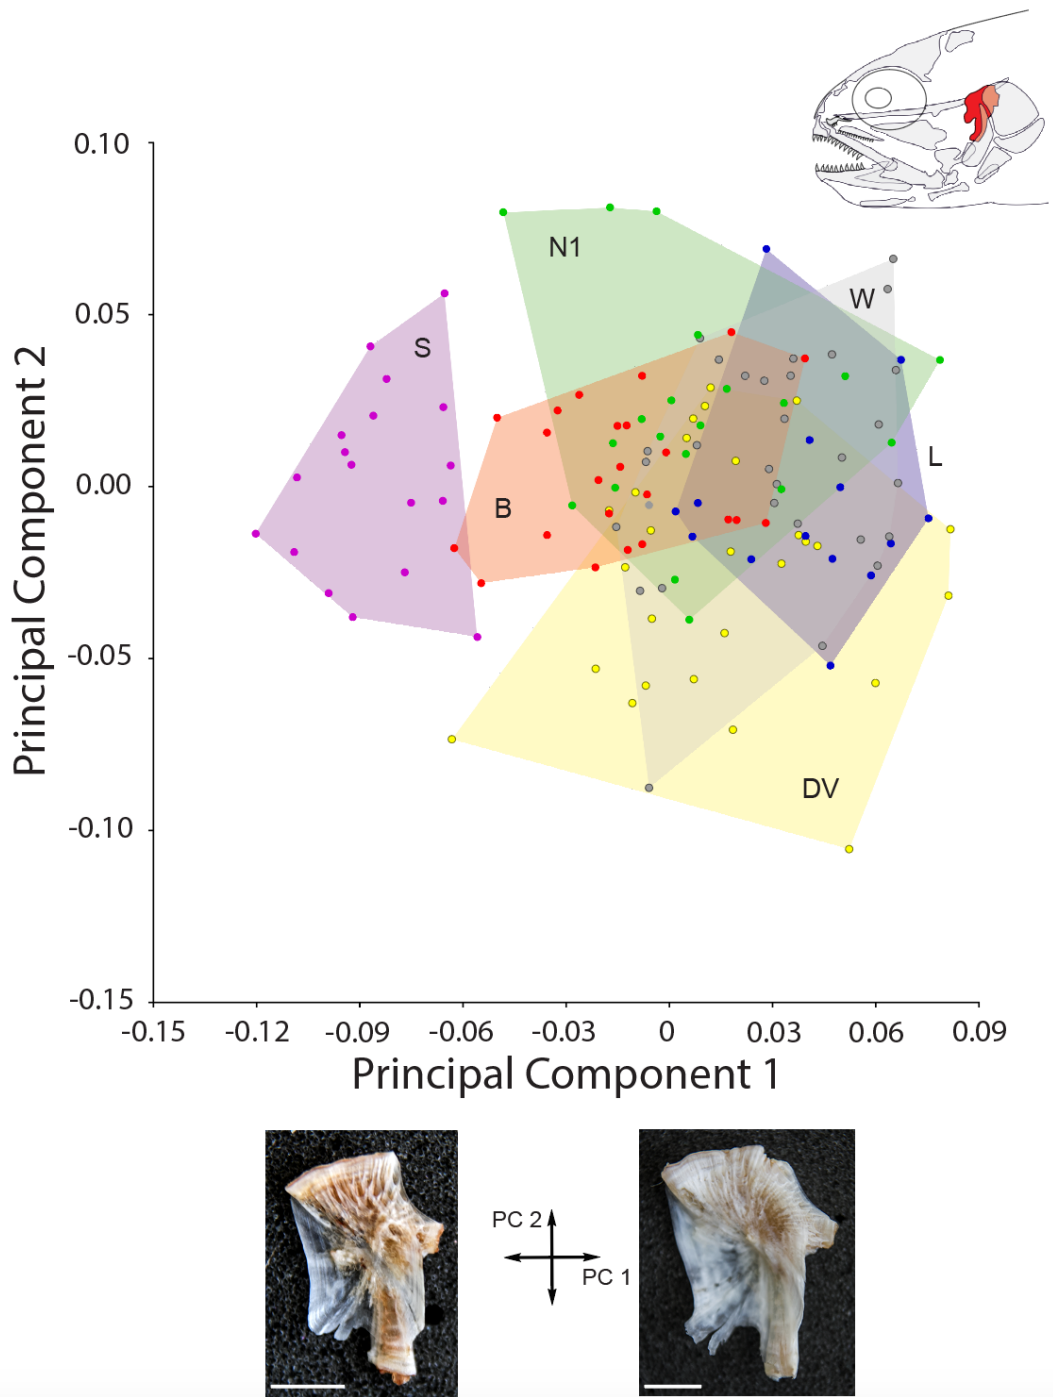

**Figure 7 – Supplementary Figure 3. Geometric morphometric analyses of hyomandibula among Lake Kronotskoe morphs.** Procrustes analyses identified significant differences in shape (Procrustes ANOVA  $F_{60;1212}=6.55$   $p<0.001$ ) with Smallmouth morphs possessing the most distinct shape.

**Figure 7 – Supplementary Figure 4**

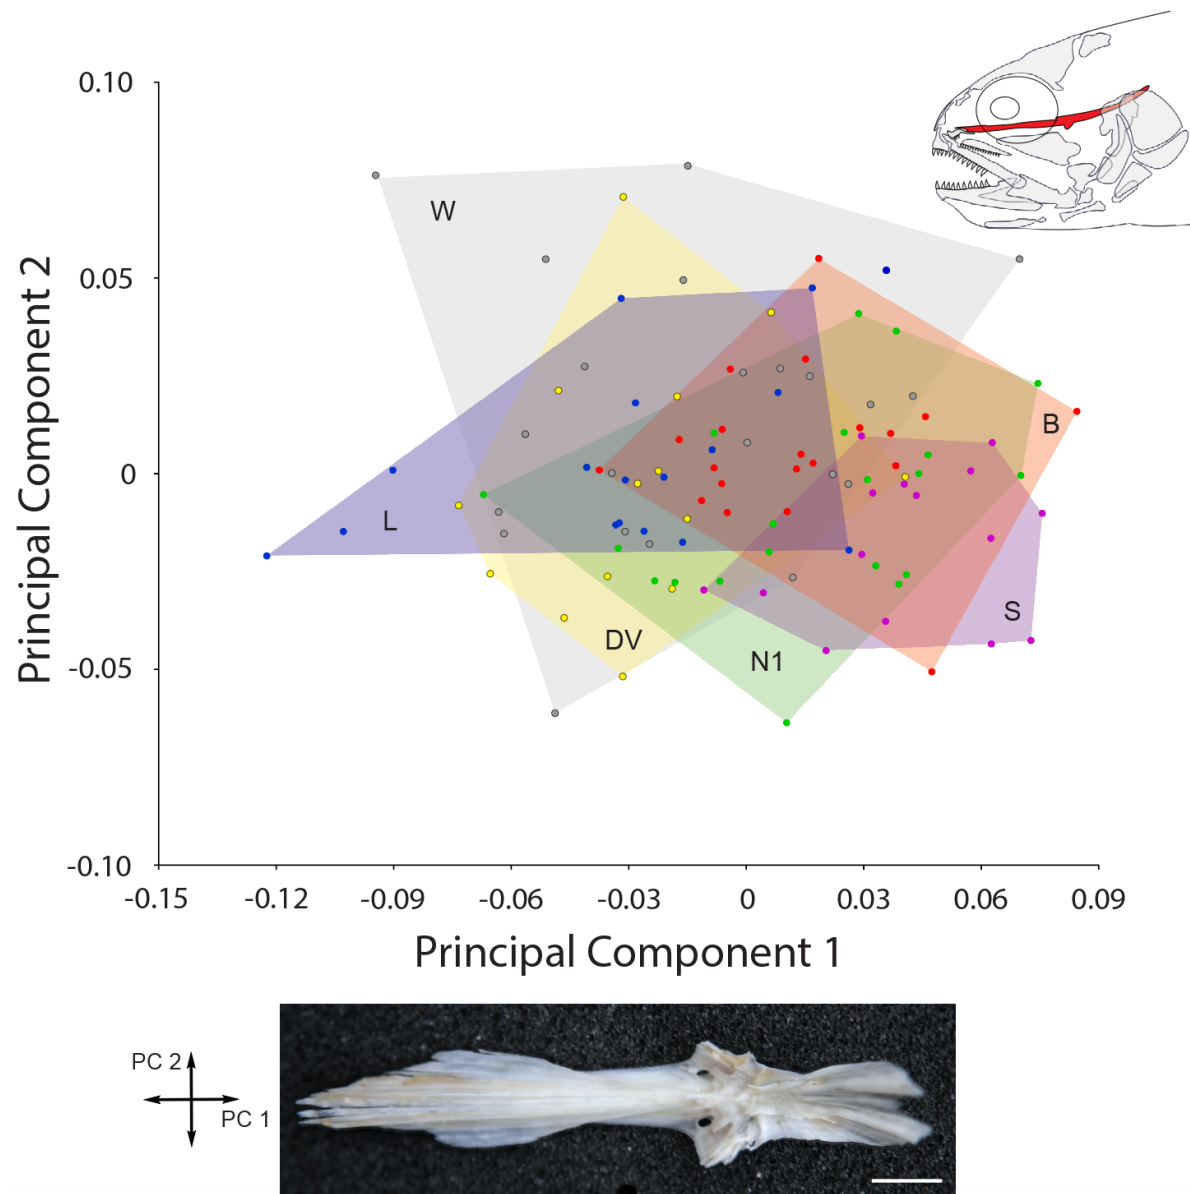

**Figure 7 – Supplementary Figure 4. Geometric morphometric analyses of parasphenoid among Lake Kronotskoe morphs.** Procrustes analyses identified no significant differences in shape. Scale bar = 10mm.
